# Supplementary material for: Resistant starch can improve insulin sensitivity independently of the gut microbiota
Source: Springer Nature journal article supplement (doi:10.1186/s40168-017-0230-5), 2017-01-31

# Figure S2

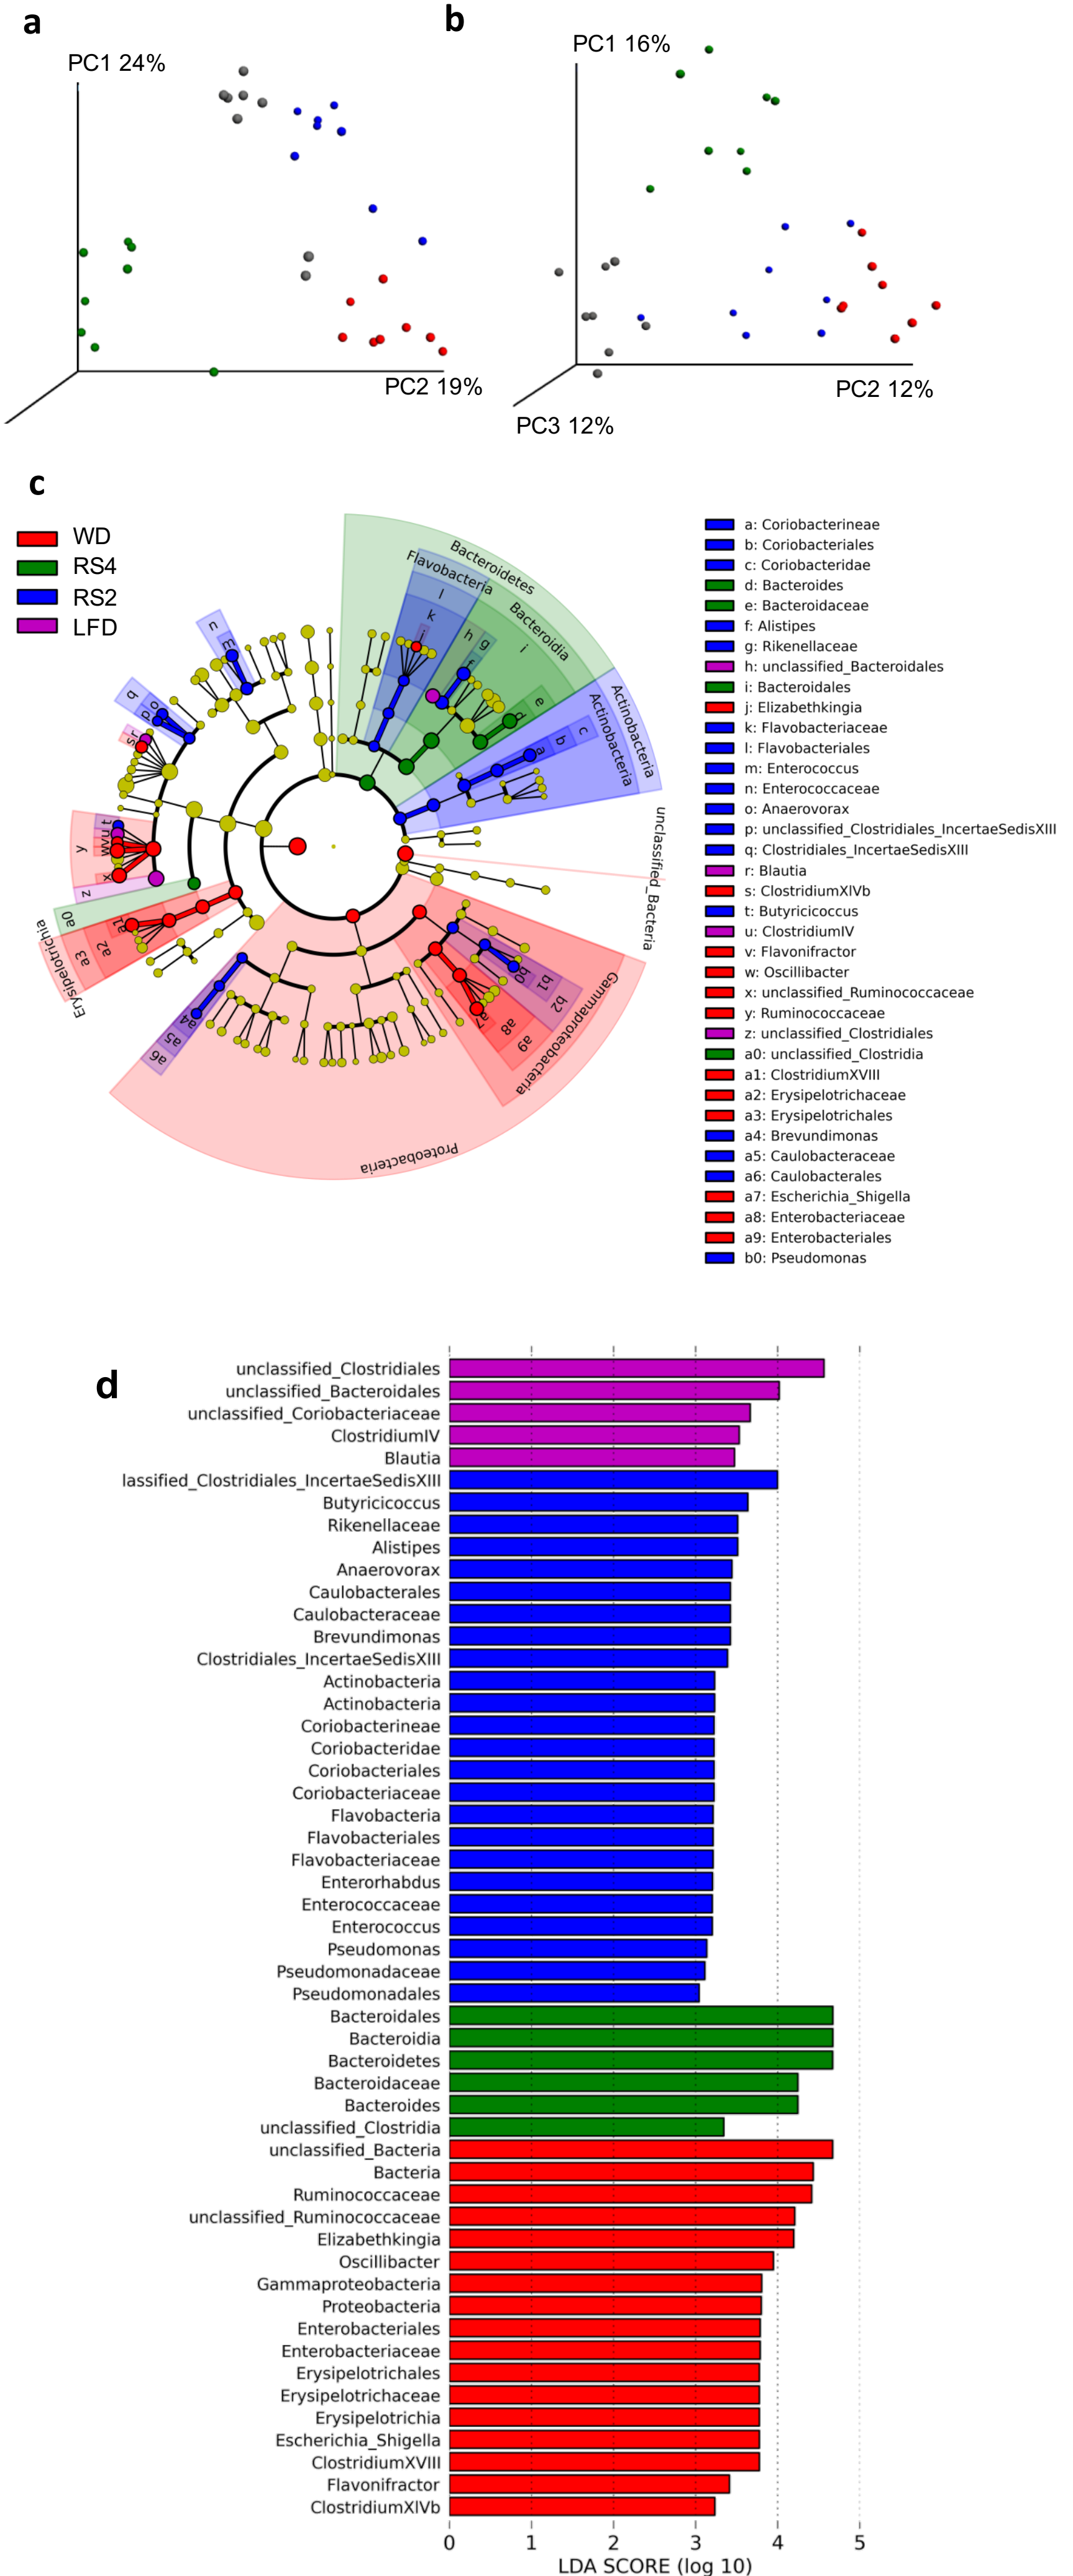

Supplement: 40168_2017_230_MOESM2_ESM.pdf [file 40168_2017_230_MOESM2_ESM.pdf]
