# Supplementary material for: Resistant starch can improve insulin sensitivity independently of the gut microbiota
Source: Springer Nature journal article supplement (doi:10.1186/s40168-017-0230-5), 2017-01-31
Supplement: 40168_2017_230_MOESM3_ESM.pdf [file 40168_2017_230_MOESM3_ESM.pdf]

Supplemental Table 1

| OTUId   | family                          | % ID  | R_FDR_p  | LFD      | WD     | RS2      | RS4      | SEM LFD | SEM WD | SEM RS2 | SEM RS4 |
|---------|---------------------------------|-------|----------|----------|--------|----------|----------|---------|--------|---------|---------|
| OTU_37  | unclassified Lachnospiraceae    | 1     | 4.05E-49 | 0.0055 * | 0.0221 | 0.0023 * | 0.0266   | 0.0024  | 0.0065 | 0.0009  | 0.0015  |
| OTU_104 | Clostridium sp.                 | 0.943 | 2.18E-38 | 0.0007 * | 0.0030 | 0.0045   | 0.0002 * | 0.0001  | 0.0010 | 0.0003  | 0.0001  |
| OTU_13  | unclassified Lachnospiraceae    | 1     | 1.85E-22 | 0.0176 * | 0.0000 | 0.0391 * | 0.0017   | 0.0030  | 0.0000 | 0.0066  | 0.0011  |
| OTU_80  | unclassified Lachnospiraceae    | 1     | 5.98E-21 | 0.0008 * | 0.0065 | 0.0093 * | 0.0011 * | 0.0002  | 0.0009 | 0.0009  | 0.0003  |
| OTU_110 | unclassified Lachnospiraceae    | 1     | 1.46E-20 | 0.0023   | 0.0017 | 0.0014   | 0.0000   | 0.0003  | 0.0004 | 0.0008  | 0.0000  |
| OTU_43  | Clostridiales bacterium CIEAF 0 | 0.963 | 3.94E-17 | 0.0165   | 0.0093 | 0.0007   | 0.0229 * | 0.0050  | 0.0024 | 0.0002  | 0.0030  |
| OTU_33  | Clostridiales bacterium CIEAF 0 | 1     | 3.45E-15 | 0.0000   | 0.0006 | 0.0014   | 0.0473 * | 0.0000  | 0.0002 | 0.0006  | 0.0069  |
| OTU_138 | Marvinbryantia sp.              | 1     | 2.57E-14 | 0.0000 * | 0.0013 | 0.0019   | 0.0003 * | 0.0000  | 0.0003 | 0.0005  | 0.0000  |
| OTU_40  | Clostridium sp. ASF502          | 1     | 8.92E-14 | 0.0151   | 0.0068 | 0.0123   | 0.0006   | 0.0032  | 0.0011 | 0.0033  | 0.0001  |
| OTU_207 | Lachnospiraceae sp.             | 0.924 | 5.65E-13 | 0.0233   | 0.0037 | 0.0145   | 0.0466 * | 0.0026  | 0.0007 | 0.0070  | 0.0121  |
| OTU_58  | unclassified Lachnospiraceae    | 1     | 1.75E-12 | 0.0054   | 0.0032 | 0.0070   | 0.0001   | 0.0010  | 0.0016 | 0.0012  | 0.0001  |
| OTU_27  | unclassified Lachnospiraceae    | 1     | 6.30E-12 | 0.0100   | 0.0121 | 0.0098   | 0.0044 * | 0.0017  | 0.0010 | 0.0022  | 0.0005  |
| OTU_113 | unclassified Lachnospiraceae    | 1     | 7.60E-12 | 0.0000 * | 0.0008 | 0.0006   | 0.0005   | 0.0000  | 0.0002 | 0.0001  | 0.0001  |
| OTU_21  | unclassified Lachnospiraceae    | 0.975 | 7.60E-12 | 0.0186 * | 0.0089 | 0.0043   | 0.0224 * | 0.0031  | 0.0017 | 0.0011  | 0.0028  |
| OTU_98  | Clostridium XIVb sp.            | 0.971 | 9.74E-12 | 0.0025   | 0.0025 | 0.0019   | 0.0006 * | 0.0004  | 0.0003 | 0.0003  | 0.0001  |
| OTU_107 | Clostridium XIVa sp.            | 1     | 3.74E-11 | 0.0003 * | 0.0021 | 0.0024   | 0.0013   | 0.0002  | 0.0004 | 0.0003  | 0.0004  |
| OTU_134 | unclassified Lachnospiraceae    | 1     | 8.01E-11 | 0.0002   | 0.0001 | 0.0014 * | 0.0013 * | 0.0001  | 0.0000 | 0.0002  | 0.0002  |
| OTU_115 | unclassified Lachnospiraceae    | 1     | 1.72E-10 | 0.0020 * | 0.0000 | 0.0002   | 0.0012 * | 0.0005  | 0.0000 | 0.0001  | 0.0002  |
| OTU_71  | unclassified Lachnospiraceae    | 0.971 | 2.90E-10 | 0.0028   | 0.0054 | 0.0000 * | 0.0043   | 0.0009  | 0.0018 | 0.0000  | 0.0008  |
| OTU_16  | Clostridium XIVa sp.            | 1     | 4.37E-10 | 0.0229   | 0.0246 | 0.0176   | 0.0067 * | 0.0055  | 0.0028 | 0.0035  | 0.0011  |
| OTU_240 | Ruminococcus sp.                | 0.992 | 6.70E-10 | 0.0011   | 0.0011 | 0.0070   | 0.0001   | 0.0003  | 0.0002 | 0.0057  | 0.0000  |
| OTU_254 | unclassified Lachnospiraceae    | 0.929 | 6.70E-10 | 0.0071   | 0.0134 | 0.0000 * | 0.0112   | 0.0024  | 0.0040 | 0.0000  | 0.0023  |
| OTU_63  | unclassified Lachnospiraceae    | 0.971 | 6.70E-10 | 0.0032   | 0.0064 | 0.0000 * | 0.0060   | 0.0011  | 0.0018 | 0.0000  | 0.0012  |
| OTU_92  | Clostridium XIVa sp.            | 1     | 9.70E-10 | 0.0034 * | 0.0022 | 0.0016   | 0.0008 * | 0.0004  | 0.0003 | 0.0002  | 0.0002  |
| OTU_7   | unclassified Lachnospiraceae    | 1     | 1.64E-09 | 0.0189 * | 0.0524 | 0.0580   | 0.0088 * | 0.0037  | 0.0095 | 0.0092  | 0.0014  |
| OTU_5   | unclassified Lachnospiraceae    | 1     | 2.91E-09 | 0.1109 * | 0.0000 | 0.0310   | 0.0071   | 0.0207  | 0.0000 | 0.0065  | 0.0037  |
| OTU_67  | unclassified Lachnospiraceae    | 1     | 6.66E-09 | 0.0087 * | 0.0024 | 0.0018   | 0.0013   | 0.0011  | 0.0003 | 0.0002  | 0.0003  |
| OTU_10  | Lachnospiraceae bacterium A2    | 1     | 8.27E-09 | 0.0018   | 0.0012 | 0.0000   | 0.0391 * | 0.0004  | 0.0008 | 0.0000  | 0.0086  |
| OTU_305 | unclassified Lachnospiraceae    | 0.918 | 1.26E-08 | 0.0000   | 0.0008 | 0.0008   | 0.0154 * | 0.0000  | 0.0003 | 0.0003  | 0.0022  |
| OTU_139 | Marvinbryantia sp.              | 1     | 5.22E-08 | 0.0001 * | 0.0012 | 0.0019   | 0.0002 * | 0.0000  | 0.0003 | 0.0004  | 0.0001  |
| OTU_279 | Lachnospiraceae bacterium A2    | 0.917 | 7.35E-08 | 0.0006   | 0.0005 | 0.0000   | 0.0127 * | 0.0001  | 0.0004 | 0.0000  | 0.0032  |
| OTU_187 | unclassified Lachnospiraceae    | 1     | 2.07E-07 | 0.0004 * | 0.0000 | 0.0000   | 0.0000   | 0.0001  | 0.0000 | 0.0000  | 0.0000  |

Supplemental Table 1

|         |                                 |       |          |          |        |          |          |        |        |        |        |
|---------|---------------------------------|-------|----------|----------|--------|----------|----------|--------|--------|--------|--------|
| OTU_77  | Clostridium XIVa sp.            | 1     | 2.07E-07 | 0.0047 * | 0.0022 | 0.0023   | 0.0007   | 0.0008 | 0.0005 | 0.0005 | 0.0002 |
| OTU_170 | Anaerotruncus sp.               | 1     | 2.73E-07 | 0.0002   | 0.0001 | 0.0003   | 0.0006 * | 0.0001 | 0.0000 | 0.0001 | 0.0001 |
| OTU_86  | unclassified Ruminococcaceae    | 1     | 3.01E-07 | 0.0018 * | 0.0034 | 0.0024   | 0.0012 * | 0.0003 | 0.0004 | 0.0003 | 0.0001 |
| OTU_41  | unclassified Clostridiales      | 1     | 3.11E-07 | 0.0003   | 0.0002 | 0.0001   | 0.0003   | 0.0001 | 0.0001 | 0.0000 | 0.0000 |
| OTU_140 | Anaerovorax                     | 1     | 3.11E-07 | 0.0003 * | 0.0008 | 0.0008   | 0.0002 * | 0.0000 | 0.0001 | 0.0002 | 0.0001 |
| OTU_146 | unclassified Ruminococcaceae    | 1     | 3.99E-07 | 0.0000   | 0.0004 | 0.0005   | 0.0012 * | 0.0000 | 0.0001 | 0.0002 | 0.0003 |
| OTU_12  | Lachnospiraceae bacterium 610   | 0.95  | 4.12E-07 | 0.0360   | 0.0221 | 0.0141   | 0.0413 * | 0.0033 | 0.0062 | 0.0029 | 0.0058 |
| OTU_56  | Clostridium XIVb sp.            | 1     | 5.96E-07 | 0.0062   | 0.0043 | 0.0051   | 0.0024   | 0.0007 | 0.0005 | 0.0012 | 0.0003 |
| OTU_96  | unclassified Lachnospiraceae    | 0.893 | 6.91E-07 | 0.0002 * | 0.0057 | 0.0064   | 0.0028   | 0.0001 | 0.0017 | 0.0016 | 0.0007 |
| OTU_114 | Clostridium XIVa sp.            | 1     | 1.94E-06 | 0.0000   | 0.0001 | 0.0002   | 0.0028 * | 0.0000 | 0.0001 | 0.0001 | 0.0008 |
| OTU_51  | unclassified Lachnospiraceae    | 1     | 2.25E-06 | 0.0068 * | 0.0165 | 0.0144   | 0.0077 * | 0.0011 | 0.0017 | 0.0027 | 0.0011 |
| OTU_6   | Oscillibacter sp.               | 1     | 3.32E-06 | 0.0319   | 0.0437 | 0.0227 * | 0.0257 * | 0.0036 | 0.0033 | 0.0047 | 0.0023 |
| OTU_100 | Clostridium XIVb sp.            | 0.895 | 4.67E-06 | 0.0019   | 0.0023 | 0.0019   | 0.0006 * | 0.0004 | 0.0004 | 0.0003 | 0.0002 |
| OTU_45  | unclassified Lachnospiraceae    | 1     | 6.63E-06 | 0.0071   | 0.0094 | 0.0000 * | 0.0107   | 0.0024 | 0.0030 | 0.0000 | 0.0031 |
| OTU_147 | unclassified Lachnospiraceae    | 1     | 1.28E-05 | 0.0006   | 0.0006 | 0.0007   | 0.0002   | 0.0001 | 0.0001 | 0.0002 | 0.0000 |
| OTU_129 | unclassified Lachnospiraceae    | 1     | 1.40E-05 | 0.0004   | 0.0001 | 0.0008   | 0.0014 * | 0.0001 | 0.0001 | 0.0006 | 0.0003 |
| OTU_116 | unclassified Lachnospiraceae    | 1     | 1.51E-05 | 0.0035 * | 0.0000 | 0.0000   | 0.0042 * | 0.0010 | 0.0000 | 0.0000 | 0.0011 |
| OTU_123 | Alistipes finegoldii            | 1     | 1.81E-05 | 0.0005   | 0.0002 | 0.0000   | 0.0003   | 0.0002 | 0.0001 | 0.0000 | 0.0001 |
| OTU_57  | unclassified Ruminococcaceae    | 1     | 2.23E-05 | 0.0032 * | 0.0084 | 0.0025 * | 0.0023 * | 0.0007 | 0.0011 | 0.0008 | 0.0006 |
| OTU_142 | Pseudomonas mucidolens (T)      | 1     | 2.37E-05 | 0.0002   | 0.0007 | 0.0008   | 0.0001 * | 0.0000 | 0.0001 | 0.0003 | 0.0000 |
| OTU_281 | unclassified Lachnospiraceae    | 1     | 2.59E-05 | 0.0004   | 0.0123 | 0.0096   | 0.0049   | 0.0001 | 0.0040 | 0.0057 | 0.0013 |
| OTU_99  | Lachnospiraceae                 | 1     | 2.67E-05 | 0.0009   | 0.0016 | 0.0026 * | 0.0013   | 0.0001 | 0.0004 | 0.0003 | 0.0001 |
| OTU_163 | Clostridium IV sp.              | 1     | 2.67E-05 | 0.0000   | 0.0000 | 0.0004 * | 0.0000   | 0.0000 | 0.0000 | 0.0001 | 0.0000 |
| OTU_44  | Clostridium sp.                 | 1     | 3.73E-05 | 0.0166 * | 0.0017 | 0.0056   | 0.0067   | 0.0059 | 0.0009 | 0.0013 | 0.0006 |
| OTU_82  | Clostridium XIVa sp.            | 1     | 3.76E-05 | 0.0050 * | 0.0005 | 0.0024   | 0.0017   | 0.0015 | 0.0002 | 0.0005 | 0.0005 |
| OTU_74  | Robinsoniella                   | 1     | 4.62E-05 | 0.0005   | 0.0049 | 0.0082   | 0.0057   | 0.0001 | 0.0011 | 0.0036 | 0.0028 |
| OTU_2   | Lachnospiraceae bacterium 14-   | 1     | 5.39E-05 | 0.0817 * | 0.0101 | 0.0940 * | 0.0454   | 0.0168 | 0.0082 | 0.0230 | 0.0162 |
| OTU_59  | unclassified Lachnospiraceae    | 1     | 5.75E-05 | 0.0049   | 0.0058 | 0.0034 * | 0.0024 * | 0.0008 | 0.0006 | 0.0004 | 0.0004 |
| OTU_65  | Clostridiales bacterium CIEAF 0 | 0.942 | 6.50E-05 | 0.0044   | 0.0037 | 0.0006   | 0.0043   | 0.0016 | 0.0013 | 0.0002 | 0.0009 |
| OTU_242 | unclassified Lachnospiraceae    | 0.967 | 8.07E-05 | 0.0006 * | 0.0152 | 0.0113   | 0.0054   | 0.0001 | 0.0051 | 0.0063 | 0.0015 |
| OTU_36  | Clostridiales bacterium CIEAF 0 | 1     | 9.77E-05 | 0.0090   | 0.0138 | 0.0121   | 0.0054 * | 0.0014 | 0.0018 | 0.0031 | 0.0008 |
| OTU_262 | unclassified Lachnospiraceae    | 0.987 | 1.13E-04 | 0.0000   | 0.0000 | 0.0082 * | 0.0000   | 0.0000 | 0.0000 | 0.0017 | 0.0000 |
| OTU_22  | Clostridium XIVa sp.            | 1     | 1.78E-04 | 0.0199   | 0.0151 | 0.0150   | 0.0106   | 0.0019 | 0.0012 | 0.0016 | 0.0011 |
| OTU_39  | unclassified Lachnospiraceae    | 1     | 2.78E-04 | 0.0136   | 0.0284 | 0.0001 * | 0.0078   | 0.0072 | 0.0077 | 0.0000 | 0.0053 |

Supplemental Table 1

|         |                                |       |          |          |        |          |          |        |        |        |        |
|---------|--------------------------------|-------|----------|----------|--------|----------|----------|--------|--------|--------|--------|
| OTU_109 | unclassified Ruminococcaceae   | 1     | 3.27E-04 | 0.0003 * | 0.0010 | 0.0004 * | 0.0002 * | 0.0001 | 0.0002 | 0.0001 | 0.0001 |
| OTU_47  | Clostridium XIVa sp.           | 1     | 3.27E-04 | 0.0011   | 0.0063 | 0.0101   | 0.0011   | 0.0003 | 0.0018 | 0.0029 | 0.0005 |
| OTU_60  | Lachnospiracea incertae sedis  | 1     | 3.27E-04 | 0.0038   | 0.0067 | 0.0060   | 0.0012 * | 0.0007 | 0.0021 | 0.0014 | 0.0005 |
| OTU_81  | unclassified Lachnospiraceae   | 1     | 3.41E-04 | 0.0020 * | 0.0060 | 0.0004 * | 0.0004 * | 0.0007 | 0.0015 | 0.0002 | 0.0001 |
| OTU_131 | Butyricicoccus sp.             | 1     | 4.19E-04 | 0.0002 * | 0.0007 | 0.0008   | 0.0005   | 0.0000 | 0.0002 | 0.0002 | 0.0001 |
| OTU_50  | unclassified Lachnospiraceae   | 1     | 4.19E-04 | 0.0001   | 0.0000 | 0.0270 * | 0.0000   | 0.0001 | 0.0000 | 0.0062 | 0.0000 |
| OTU_173 | Elizabethkingia meningoseptica | 1     | 4.71E-04 | 0.0001 * | 0.0003 | 0.0003   | 0.0001 * | 0.0000 | 0.0001 | 0.0001 | 0.0000 |
| OTU_172 | unclassified Lachnospiraceae   | 1     | 4.83E-04 | 0.0004   | 0.0004 | 0.0004   | 0.0000   | 0.0001 | 0.0002 | 0.0002 | 0.0000 |
| OTU_94  | Clostridium IV sp.             | 1     | 5.39E-04 | 0.0070 * | 0.0011 | 0.0005   | 0.0006   | 0.0011 | 0.0003 | 0.0003 | 0.0001 |
| OTU_169 | Clostridium XIVa sp.           | 0.934 | 5.51E-04 | 0.0005   | 0.0004 | 0.0009 * | 0.0002   | 0.0001 | 0.0000 | 0.0001 | 0.0001 |
| OTU_68  | segmented filamentous bacteri  | 1     | 5.81E-04 | 0.0000   | 0.0005 | 0.0007   | 0.0002   | 0.0000 | 0.0002 | 0.0004 | 0.0001 |
| OTU_108 | Enterococcus faecalis          | 1     | 6.00E-04 | 0.0002   | 0.0020 | 0.0032   | 0.0005   | 0.0001 | 0.0005 | 0.0012 | 0.0001 |
| OTU_103 | Clostridium fusiformis         | 0.912 | 8.46E-04 | 0.0017   | 0.0015 | 0.0012   | 0.0006   | 0.0003 | 0.0002 | 0.0004 | 0.0001 |
| OTU_196 | Clostridium orbiscindens (T)   | 0.91  | 1.11E-03 | 0.0002 * | 0.0000 | 0.0001   | 0.0000   | 0.0000 | 0.0000 | 0.0000 | 0.0000 |
| OTU_75  | unclassified Firmicutes        | 1     | 1.47E-03 | 0.0035 * | 0.0017 | 0.0022   | 0.0018   | 0.0004 | 0.0002 | 0.0003 | 0.0002 |
| OTU_34  | Lachnospiraceae bacterium 615  | 0.941 | 1.70E-03 | 0.0022   | 0.0038 | 0.0208   | 0.0108   | 0.0007 | 0.0027 | 0.0095 | 0.0024 |
| OTU_159 | Clostridium IV sp.             | 1     | 2.20E-03 | 0.0000   | 0.0002 | 0.0000   | 0.0004   | 0.0000 | 0.0001 | 0.0000 | 0.0001 |
| OTU_231 | unclassified Ruminococcaceae   | 1     | 3.87E-03 | 0.0000   | 0.0000 | 0.0000   | 0.0001 * | 0.0000 | 0.0000 | 0.0000 | 0.0000 |
| OTU_53  | unclassified Lachnospiraceae   | 1     | 3.87E-03 | 0.0000   | 0.0000 | 0.0013   | 0.0162 * | 0.0000 | 0.0000 | 0.0006 | 0.0074 |
| OTU_49  | Bacteroides caccae             | 1     | 4.27E-03 | 0.0032   | 0.0020 | 0.0081 * | 0.0005   | 0.0013 | 0.0007 | 0.0022 | 0.0003 |
| OTU_26  | unclassified Ruminococcaceae   | 1     | 4.83E-03 | 0.0072 * | 0.0178 | 0.0166   | 0.0073 * | 0.0006 | 0.0035 | 0.0037 | 0.0010 |
| OTU_193 | alpha proteobacterium VUN100   | 1     | 5.14E-03 | 0.0001   | 0.0001 | 0.0002   | 0.0001   | 0.0000 | 0.0000 | 0.0000 | 0.0000 |
| OTU_31  | unclassified Lachnospiraceae   | 1     | 5.69E-03 | 0.0036   | 0.0000 | 0.0000   | 0.0486 * | 0.0021 | 0.0000 | 0.0000 | 0.0154 |
| OTU_72  | Enterorhabdus sp.              | 0.97  | 5.69E-03 | 0.0018   | 0.0018 | 0.0034   | 0.0008   | 0.0003 | 0.0002 | 0.0011 | 0.0002 |
| OTU_175 | unclassified Lachnospiraceae   | 1     | 6.38E-03 | 0.0000   | 0.0000 | 0.0000   | 0.0008 * | 0.0000 | 0.0000 | 0.0000 | 0.0004 |
| OTU_290 | unclassified Lachnospiraceae   | 0.971 | 6.38E-03 | 0.0002   | 0.0004 | 0.0009 * | 0.0002   | 0.0000 | 0.0001 | 0.0002 | 0.0001 |
| OTU_66  | unclassified Lachnospiraceae   | 1     | 6.62E-03 | 0.0068 * | 0.0000 | 0.0041   | 0.0025   | 0.0032 | 0.0000 | 0.0013 | 0.0017 |
| OTU_141 | unclassified Clostridiales     | 1     | 6.98E-03 | 0.0002   | 0.0002 | 0.0003   | 0.0010 * | 0.0001 | 0.0001 | 0.0001 | 0.0002 |
| OTU_162 | Oscillibacter sp.              | 0.98  | 7.25E-03 | 0.0002   | 0.0001 | 0.0002   | 0.0006 * | 0.0001 | 0.0000 | 0.0001 | 0.0001 |
| OTU_183 | Anaerovorax sp.                | 1     | 8.27E-03 | 0.0001   | 0.0001 | 0.0005 * | 0.0001   | 0.0001 | 0.0000 | 0.0001 | 0.0000 |
| OTU_4   | unclassified Lachnospiraceae   | 1     | 9.77E-03 | 0.0155 * | 0.0499 | 0.0266   | 0.0258   | 0.0035 | 0.0095 | 0.0095 | 0.0108 |
| OTU_297 | Clostridium fusiformis         | 0.946 | 9.77E-03 | 0.0054   | 0.0004 | 0.0003   | 0.0000   | 0.0038 | 0.0002 | 0.0001 | 0.0000 |
| OTU_148 | Anaerotruncus sp.              | 1     | 1.27E-02 | 0.0007   | 0.0005 | 0.0003   | 0.0003   | 0.0001 | 0.0001 | 0.0001 | 0.0001 |
| OTU_158 | unclassified Lachnospiraceae   | 1     | 1.27E-02 | 0.0003   | 0.0003 | 0.0001 * | 0.0002   | 0.0001 | 0.0001 | 0.0000 | 0.0001 |

**Supplemental Table 1**

|         |                                 |       |          |          |        |          |          |        |        |        |        |
|---------|---------------------------------|-------|----------|----------|--------|----------|----------|--------|--------|--------|--------|
| OTU_136 | Clostridium XIVa sp.            | 1     | 1.33E-02 | 0.0003   | 0.0000 | 0.0000   | 0.0002   | 0.0001 | 0.0000 | 0.0000 | 0.0002 |
| OTU_324 | unclassified Lachnospiraceae    | 0.938 | 1.45E-02 | 0.0015 * | 0.0006 | 0.0004   | 0.0003   | 0.0003 | 0.0002 | 0.0002 | 0.0001 |
| OTU_15  | Clostridium cocleatum           | 1     | 1.58E-02 | 0.0067   | 0.0144 | 0.0079   | 0.0029 * | 0.0026 | 0.0029 | 0.0044 | 0.0018 |
| OTU_191 | unclassified Lachnospiraceae    | 1     | 1.68E-02 | 0.0004 * | 0.0000 | 0.0000   | 0.0000   | 0.0001 | 0.0000 | 0.0000 | 0.0000 |
| OTU_337 | Oscillibacter sp.               | 0.942 | 1.72E-02 | 0.0013   | 0.0029 | 0.0034   | 0.0023   | 0.0004 | 0.0007 | 0.0005 | 0.0004 |
| OTU_203 | Clostridium XIVa sp.            | 1     | 1.75E-02 | 0.0002 * | 0.0001 | 0.0000   | 0.0000   | 0.0000 | 0.0000 | 0.0000 | 0.0000 |
| OTU_25  | Barnesiella sp.                 | 1     | 1.75E-02 | 0.0240 * | 0.0060 | 0.0134   | 0.0137   | 0.0068 | 0.0013 | 0.0047 | 0.0033 |
| OTU_160 | Parvibacter caecicola           | 0.932 | 1.93E-02 | 0.0004   | 0.0001 | 0.0004   | 0.0001   | 0.0001 | 0.0001 | 0.0001 | 0.0000 |
| OTU_157 | unclassified Lachnospiraceae    | 1     | 1.95E-02 | 0.0004   | 0.0004 | 0.0007   | 0.0002   | 0.0001 | 0.0001 | 0.0002 | 0.0001 |
| OTU_69  | Eubacterium plexicaudatum       | 0.971 | 2.21E-02 | 0.0000   | 0.0000 | 0.0041   | 0.0038   | 0.0000 | 0.0000 | 0.0022 | 0.0016 |
| OTU_64  | Saccharibacteria genera incerta | 1     | 2.44E-02 | 0.0012   | 0.0000 | 0.0085   | 0.0058   | 0.0005 | 0.0000 | 0.0062 | 0.0025 |
| OTU_151 | unclassified Lachnospiraceae    | 1     | 2.48E-02 | 0.0005   | 0.0002 | 0.0002   | 0.0004   | 0.0001 | 0.0000 | 0.0001 | 0.0001 |
| OTU_88  | Clostridium XIVa sp.            | 0.942 | 2.48E-02 | 0.0024   | 0.0006 | 0.0013   | 0.0037 * | 0.0009 | 0.0003 | 0.0006 | 0.0009 |
| OTU_23  | Alistipes sp.                   | 1     | 2.63E-02 | 0.0025   | 0.0047 | 0.0097 * | 0.0054   | 0.0008 | 0.0008 | 0.0023 | 0.0008 |
| OTU_1   | Lachnospiraceae bacterium 609   | 1     | 2.67E-02 | 0.0355 * | 0.1086 | 0.0436 * | 0.0247 * | 0.0152 | 0.0190 | 0.0180 | 0.0146 |
| OTU_78  | Clostridium XIVa                | 1     | 2.68E-02 | 0.0039   | 0.0023 | 0.0036   | 0.0020   | 0.0009 | 0.0002 | 0.0005 | 0.0004 |
| OTU_83  | Clostridiales bacterium CIEAF 0 | 0.951 | 2.72E-02 | 0.0035   | 0.0056 | 0.0062   | 0.0043   | 0.0004 | 0.0013 | 0.0009 | 0.0008 |
| OTU_130 | unclassified Lachnospiraceae    | 1     | 2.77E-02 | 0.0004   | 0.0005 | 0.0009   | 0.0002   | 0.0001 | 0.0002 | 0.0003 | 0.0000 |
| OTU_112 | unclassified Lachnospiraceae    | 1     | 2.87E-02 | 0.0000   | 0.0000 | 0.0006 * | 0.0001   | 0.0000 | 0.0000 | 0.0002 | 0.0000 |
| OTU_61  | Shigella boydii                 | 1     | 3.26E-02 | 0.0002 * | 0.0129 | 0.0029   | 0.0037   | 0.0001 | 0.0050 | 0.0012 | 0.0024 |
| OTU_93  | unclassified Ruminococcaceae    | 0.984 | 3.73E-02 | 0.0034   | 0.0024 | 0.0055 * | 0.0023   | 0.0007 | 0.0006 | 0.0010 | 0.0003 |
| OTU_9   | Clostridiales bacterium CIEAF 0 | 0.971 | 3.73E-02 | 0.0083 * | 0.0628 | 0.0046 * | 0.0000 * | 0.0081 | 0.0238 | 0.0046 | 0.0000 |
| OTU_227 | unclassified Ruminococcaceae    | 0.975 | 4.43E-02 | 0.0020   | 0.0019 | 0.0009   | 0.0029   | 0.0003 | 0.0004 | 0.0003 | 0.0008 |
| OTU_101 | unclassified Lachnospiraceae    | 0.946 | 4.74E-02 | 0.0103 * | 0.0000 | 0.0000   | 0.0000   | 0.0027 | 0.0000 | 0.0000 | 0.0000 |

Supplemental Table 2

| name                              | rank   | R_FDR_p  | LFD      | WD     | RS2      | RS4      | SEM LFD  | SEM WD   | SEM RS2  | SEM RS4  |
|-----------------------------------|--------|----------|----------|--------|----------|----------|----------|----------|----------|----------|
| Bacteroidetes                     | phylum | 1,85E-03 | 0,1023   | 0,0526 | 0,0827   | 0,1384 * | 2,02E-02 | 7,14E-03 | 1,73E-02 | 2,34E-02 |
| Actinobacteria                    | phylum | 5,35E-03 | 0,0023   | 0,0019 | 0,0039   | 0,0010   | 3,98E-04 | 1,74E-04 | 1,21E-03 | 2,44E-04 |
| Proteobacteria                    | phylum | 2,12E-02 | 0,0013 * | 0,0148 | 0,0055   | 0,0044   | 3,68E-04 | 5,28E-03 | 1,46E-03 | 2,46E-03 |
| TM7                               | phylum | 3,58E-02 | 0,0012   | 0,0000 | 0,0085   | 0,0058   | 5,03E-04 | 0,00E+00 | 6,18E-03 | 2,49E-03 |
| Pseudomonadales                   | order  | 1,28E-04 | 0,0002   | 0,0007 | 0,0009   | 0,0002   | 5,03E-05 | 1,18E-04 | 3,26E-04 | 3,82E-05 |
| Bacteroidales                     | order  | 1,85E-03 | 0,1020   | 0,0520 | 0,0820   | 0,1382 * | 2,01E-02 | 7,17E-03 | 1,73E-02 | 2,34E-02 |
| Coriobacteriales                  | order  | 5,35E-03 | 0,0023   | 0,0019 | 0,0038   | 0,0010   | 3,97E-04 | 1,72E-04 | 1,18E-03 | 2,44E-04 |
| Caulobacterales                   | order  | 8,83E-03 | 0,0001   | 0,0001 | 0,0002   | 0,0001   | 4,46E-05 | 4,49E-05 | 4,66E-05 | 1,86E-05 |
| Flavobacteriales                  | order  | 2,12E-02 | 0,0002   | 0,0004 | 0,0005   | 0,0002   | 5,65E-05 | 1,04E-04 | 1,74E-04 | 3,17E-05 |
| Erysipelotrichales                | order  | 2,38E-02 | 0,0069   | 0,0145 | 0,0082   | 0,0030 * | 2,61E-03 | 2,96E-03 | 4,39E-03 | 1,83E-03 |
| Enterobacteriales                 | order  | 2,38E-02 | 0,0004 * | 0,0134 | 0,0038   | 0,0039   | 1,47E-04 | 5,21E-03 | 1,26E-03 | 2,49E-03 |
| Bacteroidia                       | class  | 1,85E-03 | 0,1020   | 0,0520 | 0,0820   | 0,1382 * | 2,01E-02 | 7,17E-03 | 1,73E-02 | 2,34E-02 |
| Actinobacteria                    | class  | 5,35E-03 | 0,0023   | 0,0019 | 0,0039   | 0,0010   | 3,98E-04 | 1,74E-04 | 1,21E-03 | 2,44E-04 |
| Gammaproteobacteria               | class  | 1,14E-02 | 0,0008 * | 0,0143 | 0,0048   | 0,0041   | 1,89E-04 | 5,23E-03 | 1,34E-03 | 2,49E-03 |
| Flavobacteria                     | class  | 2,12E-02 | 0,0002   | 0,0004 | 0,0005   | 0,0002   | 5,65E-05 | 1,04E-04 | 1,74E-04 | 3,17E-05 |
| Erysipelotrichia                  | class  | 2,38E-02 | 0,0069   | 0,0145 | 0,0082   | 0,0030 * | 2,61E-03 | 2,96E-03 | 4,39E-03 | 1,83E-03 |
| Ruminococcaceae                   | family | 3,43E-09 | 0,0828 * | 0,1203 | 0,0969   | 0,0668 * | 5,28E-03 | 8,36E-03 | 1,06E-02 | 2,85E-03 |
| Clostridiales_Incertae Sedis XIII | family | 5,97E-07 | 0,0003 * | 0,0007 | 0,0009   | 0,0002 * | 3,83E-05 | 8,60E-05 | 1,55E-04 | 7,40E-05 |
| Pseudomonadaceae                  | family | 7,61E-05 | 0,0002   | 0,0007 | 0,0009   | 0,0002 * | 4,50E-05 | 1,18E-04 | 3,00E-04 | 4,00E-05 |
| Enterococcaceae                   | family | 1,85E-03 | 0,0002   | 0,0020 | 0,0032   | 0,0005   | 7,17E-05 | 5,35E-04 | 1,19E-03 | 1,32E-04 |
| Bacteroidaceae                    | family | 3,91E-03 | 0,0110   | 0,0075 | 0,0136   | 0,0402 * | 2,20E-03 | 1,21E-03 | 2,91E-03 | 9,21E-03 |
| Coriobacteriaceae                 | family | 5,35E-03 | 0,0023   | 0,0019 | 0,0038   | 0,0010   | 3,97E-04 | 1,72E-04 | 1,18E-03 | 2,44E-04 |
| Caulobacteraceae                  | family | 8,83E-03 | 0,0001   | 0,0001 | 0,0002   | 0,0001   | 4,46E-05 | 4,49E-05 | 4,66E-05 | 1,86E-05 |
| Flavobacteriaceae                 | family | 2,12E-02 | 0,0002   | 0,0004 | 0,0005   | 0,0002   | 5,65E-05 | 1,04E-04 | 1,74E-04 | 3,17E-05 |
| Erysipelotrichaceae               | family | 2,38E-02 | 0,0069   | 0,0145 | 0,0082   | 0,0030 * | 2,61E-03 | 2,96E-03 | 4,39E-03 | 1,83E-03 |
| Enterobacteriaceae                | family | 2,38E-02 | 0,0004 * | 0,0134 | 0,0038   | 0,0039   | 1,47E-04 | 5,21E-03 | 1,26E-03 | 2,49E-03 |
| Rikenellaceae                     | family | 3,72E-02 | 0,0030   | 0,0049 | 0,0097 * | 0,0057   | 7,65E-04 | 8,17E-04 | 2,29E-03 | 8,28E-04 |
| Clostridium IV                    | genus  | 2,44E-15 | 0,0070 * | 0,0037 | 0,0039   | 0,0007 * | 1,12E-03 | 8,08E-04 | 5,85E-04 | 1,14E-04 |
| Clostridium XIVb                  | genus  | 9,46E-08 | 0,0025   | 0,0026 | 0,0023   | 0,0007 * | 3,65E-04 | 4,61E-04 | 3,33E-04 | 1,60E-04 |
| Blautia                           | genus  | 9,46E-08 | 0,0014 * | 0,0008 | 0,0008   | 0,0002   | 2,13E-04 | 1,74E-04 | 1,77E-04 | 7,65E-05 |

## Supplemental Table 2

|                                |          |          |          |        |          |          |          |          |          |          |
|--------------------------------|----------|----------|----------|--------|----------|----------|----------|----------|----------|----------|
| Anaerovorax                    | genus    | 4,92E-07 | 0,0002 * | 0,0007 | 0,0008   | 0,0002 * | 3,96E-05 | 8,19E-05 | 1,47E-04 | 7,49E-05 |
| Oscillibacter                  | genus    | 8,96E-06 | 0,0282 * | 0,0433 | 0,0257 * | 0,0270 * | 2,80E-03 | 2,74E-03 | 3,87E-03 | 2,20E-03 |
| Pseudomonas                    | genus    | 7,61E-05 | 0,0002   | 0,0007 | 0,0009   | 0,0002 * | 4,50E-05 | 1,18E-04 | 2,89E-04 | 4,00E-05 |
| Elizabethkingia                | genus    | 1,65E-03 | 0,0001 * | 0,0003 | 0,0003   | 0,0001 * | 2,91E-05 | 5,60E-05 | 5,63E-05 | 2,29E-05 |
| Flavonifractor                 | genus    | 1,85E-03 | 0,0007 * | 0,0016 | 0,0007 * | 0,0004 * | 1,05E-04 | 2,40E-04 | 3,39E-04 | 1,43E-04 |
| Enterococcus                   | genus    | 1,85E-03 | 0,0002   | 0,0020 | 0,0032   | 0,0005   | 7,17E-05 | 5,35E-04 | 1,18E-03 | 1,33E-04 |
| Bacteroides                    | genus    | 3,91E-03 | 0,0110   | 0,0075 | 0,0136   | 0,0402 * | 2,20E-03 | 1,21E-03 | 2,91E-03 | 9,21E-03 |
| Brevundimonas                  | genus    | 8,83E-03 | 0,0001   | 0,0001 | 0,0002   | 0,0001   | 4,46E-05 | 4,49E-05 | 4,66E-05 | 1,86E-05 |
| Enterorhabdus                  | genus    | 1,00E-02 | 0,0018   | 0,0018 | 0,0034   | 0,0008   | 3,17E-04 | 1,97E-04 | 1,08E-03 | 2,39E-04 |
| Butyricicoccus                 | genus    | 1,44E-02 | 0,0002   | 0,0004 | 0,0005   | 0,0003   | 5,65E-05 | 9,28E-05 | 9,86E-05 | 9,00E-05 |
| Clostridium XVIII              | genus    | 2,38E-02 | 0,0067   | 0,0144 | 0,0079   | 0,0029 * | 2,61E-03 | 2,94E-03 | 4,45E-03 | 1,84E-03 |
| TM7_genera_incertae_sedis      | genus    | 3,58E-02 | 0,0012   | 0,0000 | 0,0085   | 0,0058   | 5,03E-04 | 0,00E+00 | 6,18E-03 | 2,49E-03 |
| Alistipes                      | genus    | 3,72E-02 | 0,0030   | 0,0049 | 0,0097 * | 0,0057   | 7,65E-04 | 8,17E-04 | 2,29E-03 | 8,28E-04 |
| Escherichia/Shigella           | genus    | 4,88E-02 | 0,0002 * | 0,0129 | 0,0029   | 0,0037   | 1,24E-04 | 5,04E-03 | 1,18E-03 | 2,42E-03 |
| Coriobacteridae                | subclass | 5,35E-03 | 0,0023   | 0,0019 | 0,0038   | 0,0010   | 3,97E-04 | 1,72E-04 | 1,18E-03 | 2,44E-04 |
| Coriobacterineae               | suborder | 5,35E-03 | 0,0023   | 0,0019 | 0,0038   | 0,0010   | 3,97E-04 | 1,72E-04 | 1,18E-03 | 2,44E-04 |
| unclassified_Bacteria          |          | 4,03E-11 | 0,0471 * | 0,1410 | 0,0666 * | 0,0493 * | 1,09E-02 | 9,56E-03 | 1,65E-02 | 1,53E-02 |
| unclassified_Ruminococcaceae   |          | 1,41E-09 | 0,0448 * | 0,0697 | 0,0621   | 0,0368 * | 3,39E-03 | 6,00E-03 | 7,68E-03 | 7,62E-04 |
| unclassified_Clostridiales     |          | 3,91E-03 | 0,1529 * | 0,0886 | 0,0824   | 0,1215   | 1,88E-02 | 7,34E-03 | 1,17E-02 | 1,09E-02 |
| unclassified_Flavobacteriaceae |          | 8,23E-03 | 0,0000   | 0,0000 | 0,0000   | 0,0000   | 0,00E+00 | 1,75E-05 | 2,21E-05 | 1,63E-05 |
| unclassified_Coriobacteriaceae |          | 3,58E-02 | 0,0005   | 0,0002 | 0,0004   | 0,0002   | 9,95E-05 | 5,79E-05 | 1,22E-04 | 4,33E-05 |
| unclassified_Clostridia        |          | 4,90E-02 | 0,0014   | 0,0019 | 0,0016   | 0,0025   | 1,71E-04 | 8,74E-05 | 2,33E-04 | 3,43E-04 |

Supplemental Table 3

| MEAN       | *p<0.05<br>Microbial status<br>#p<0.05<br>Diet<br>2w AOV | CVZ-LFD | CVZ-WD  | CVZ-RS2 | CVZ-RS4 | GF-LFD  | GF-WD   | GF-RS2  | GF-RS4  |
|------------|----------------------------------------------------------|---------|---------|---------|---------|---------|---------|---------|---------|
| CA         | CA *                                                     | 158.66  | 227.90  | 193.02  | 123.88  | 0.07    | 0.09    | 0.11    | 0.10    |
| DCA        | DCA *#                                                   | 677.81  | 763.63  | 560.53  | 335.46  | 1.06    | 1.04    | 1.27    | 1.36    |
| LCA        | LCA *                                                    | 4.97    | 7.73    | 7.43    | 4.15    | 0.01    | 0.01    | 0.01    | 0.01    |
| ACA        | ACA *                                                    | 38.53   | 39.82   | 43.49   | 34.16   | 0.17    | 0.13    | 0.14    | 0.10    |
| CDCA       | CDCA *                                                   | 1.66    | 3.36    | 1.54    | 2.95    | 0.00    | 0.00    | 0.00    | 0.00    |
| DHCA       | DHCA *#                                                  | 0.02    | 0.03    | 0.05    | 0.05    | 0.00    | 0.01    | 0.01    | 0.01    |
| 12-KLCA    | 12-KLCA *                                                | 7.79    | 6.64    | 5.57    | 4.20    | 0.02    | 0.04    | 0.01    | 0.01    |
| DHLCA      | DHLCA *                                                  | 0.23    | 0.28    | 0.25    | 0.14    | 0.00    | 0.00    | 0.00    | 0.00    |
| 7-KDCA     | 7-KDCA *                                                 | 13.27   | 16.67   | 11.76   | 5.59    | 0.18    | 0.38    | 0.41    | 0.33    |
| 7-KLCA     | 7-KLCA *                                                 | 0.69    | 0.88    | 0.50    | 0.58    | 0.00    | 0.00    | 0.00    | 0.00    |
| AILCA      | AILCA *                                                  | 0.15    | 0.12    | 0.15    | 0.13    | 0.00    | 0.00    | 0.00    | 0.00    |
| ApoCA      | ApoCA *                                                  | 0.21    | 0.19    | 0.21    | 0.14    | 0.00    | 0.00    | 0.00    | 0.00    |
| HDCA       | HDCA *                                                   | 3.46    | 3.54    | 2.82    | 1.24    | 0.20    | 0.18    | 0.15    | 0.16    |
| MuroCA     | MuroCA *                                                 | 1.32    | 1.29    | 0.77    | 0.90    | 0.00    | 0.00    | 0.00    | 0.00    |
| UDCA       | UDCA *                                                   | 14.56   | 17.24   | 11.15   | 10.44   | 0.01    | 0.01    | 0.02    | 0.01    |
| DioLCA     | DioLCA *#                                                | 0.63    | 0.42    | 0.66    | 0.31    | 0.00    | 0.00    | 0.00    | 0.00    |
| ILCA       | ILCA *                                                   | 0.85    | 1.27    | 0.91    | 0.79    | 0.00    | 0.00    | 0.00    | 0.00    |
| IDCA       | IDCA                                                     | 0.02    | 0.00    | 0.00    | 0.00    | 0.00    | 0.00    | 0.00    | 0.00    |
| 12-KCDCA   | 12-KCDCA *                                               | 2.99    | 4.05    | 2.69    | 2.12    | 0.00    | 0.01    | 0.01    | 0.00    |
| 23-NDCA    | 23-NDCA *#                                               | 0.01    | 0.01    | 0.01    | 0.01    | 0.00    | 0.01    | 0.00    | 0.00    |
| 3-OCA      | 3-OCA *                                                  | 0.72    | 0.81    | 0.74    | 0.60    | 0.00    | 0.00    | 0.00    | 0.00    |
| 6,7-DiKLCA | 6,7-DiKLCA *                                             | 0.06    | 0.07    | 0.08    | 0.07    | 0.00    | 0.02    | 0.04    | 0.01    |
| aMCA       | aMCA *#                                                  | 399.81  | 597.98  | 293.38  | 204.99  | 7.98    | 7.59    | 7.83    | 8.23    |
| bMCA       | bMCA *                                                   | 139.32  | 157.08  | 119.51  | 94.76   | 0.28    | 0.44    | 0.80    | 0.44    |
| HCA        | HCA *                                                    | 4.55    | 7.44    | 5.25    | 3.75    | 0.01    | 0.03    | 0.03    | 0.02    |
| wMCA       | wMCA *#                                                  | 1562.13 | 1986.59 | 901.84  | 612.47  | 0.96    | 0.90    | 0.91    | 0.93    |
| GCA        | GCA *#                                                   | 0.12    | 0.16    | 0.12    | 0.12    | 0.03    | 0.08    | 0.04    | 0.02    |
| CDCA       | CDCA *                                                   | 0.09    | 0.06    | 0.14    | 0.10    | 0.00    | 0.00    | 0.00    | 0.00    |
| GUDCA      | GUDCA *                                                  | 0.01    | 0.02    | 0.01    | 0.01    | 0.00    | 0.01    | 0.01    | 0.01    |
| GLCA       | GLCA *                                                   | 0.01    | 0.01    | 0.01    | 0.01    | 0.00    | 0.00    | 0.00    | 0.00    |
| GHCA       | GHCA *                                                   | 0.01    | 0.01    | 0.00    | 0.01    | 0.00    | 0.00    | 0.00    | 0.00    |
| TDCA       | TDCA *                                                   | 33.70   | 53.10   | 30.04   | 20.73   | 0.00    | 0.01    | 0.00    | 0.00    |
| TCDCA      | TCDCA *#                                                 | 1.15    | 9.63    | 1.31    | 3.34    | 2.38    | 8.31    | 5.35    | 3.04    |
| TCA        | TCA *#                                                   | 73.07   | 179.98  | 93.79   | 73.33   | 92.19   | 291.49  | 196.35  | 92.86   |
| TDHCA      | TDHCA *#                                                 | 0.01    | 0.04    | 0.04    | 0.02    | 0.11    | 0.05    | 0.05    | 0.05    |
| TLCA       | TLCA *#                                                  | 1.51    | 2.13    | 1.78    | 0.67    | 0.01    | 0.01    | 0.01    | 0.01    |
| THDC+TUDC  | THDC + TUDC #                                            | 17.79   | 73.37   | 12.82   | 24.42   | 14.51   | 36.99   | 36.12   | 18.83   |
| THC        | THC *#                                                   | 4.14    | 17.47   | 5.20    | 4.37    | 0.48    | 0.57    | 0.65    | 0.59    |
| TaMCA      | TaMCA *#                                                 | 154.53  | 627.96  | 183.08  | 200.79  | 74.95   | 233.98  | 126.78  | 94.17   |
| TbMCA      | TbMCA *#                                                 | 538.68  | 1866.80 | 396.55  | 546.74  | 1160.72 | 2067.81 | 1742.24 | 1357.45 |
| TwMCA      | TwMCA *#                                                 | 235.79  | 562.72  | 76.39   | 86.85   | 0.37    | 0.29    | 0.30    | 0.30    |
| UCA        | UCA *                                                    | 0.27    | 0.42    | 0.44    | 0.32    | 0.21    | 0.00    | 0.04    | 0.06    |
| GwMCA      | GwMCA *                                                  | 0.22    | 0.22    | 0.20    | 0.20    | 0.00    | 0.00    | 0.00    | 0.00    |
| GaMCA      | GaMCA *                                                  | 0.06    | 0.08    | 0.07    | 0.07    | 0.01    | 0.04    | 0.02    | 0.02    |
| GbMCA      | GbMCA #                                                  | 0.13    | 0.21    | 0.20    | 0.19    | 0.15    | 0.30    | 0.26    | 0.21    |
| GalloCA    | GalloCA *#                                               | 0.06    | 0.11    | 0.11    | 0.13    | 0.04    | 0.07    | 0.05    | 0.04    |

Supplemental Table 3

| SEM        | CVZ-LFD | CVZ-WD | CVZ-RS2 | CVZ-RS4 | GF-LFD | GF-WD  | GF-RS2 | GF-RS4 |
|------------|---------|--------|---------|---------|--------|--------|--------|--------|
| CA         | 25.06   | 73.06  | 62.21   | 17.73   | 0.03   | 0.02   | 0.03   | 0.02   |
| DCA        | 106.88  | 178.27 | 91.65   | 47.27   | 0.05   | 0.07   | 0.07   | 0.20   |
| LCA        | 0.75    | 2.34   | 0.66    | 1.17    | 0.00   | 0.00   | 0.00   | 0.00   |
| ACA        | 6.88    | 5.90   | 2.54    | 4.11    | 0.03   | 0.01   | 0.01   | 0.01   |
| CDCA       | 0.57    | 0.48   | 0.25    | 1.46    | 0.00   | 0.00   | 0.00   | 0.00   |
| DHCA       | 0.00    | 0.01   | 0.01    | 0.01    | 0.00   | 0.00   | 0.00   | 0.00   |
| 12-KLCA    | 1.76    | 2.02   | 0.83    | 0.81    | 0.00   | 0.01   | 0.00   | 0.00   |
| DHLCA      | 0.03    | 0.09   | 0.05    | 0.04    | 0.00   | 0.00   | 0.00   | 0.00   |
| 7-KDCA     | 4.91    | 2.90   | 1.78    | 0.74    | 0.02   | 0.05   | 0.04   | 0.02   |
| 7-KLCA     | 0.21    | 0.22   | 0.08    | 0.16    | 0.00   | 0.00   | 0.00   | 0.00   |
| AILCA      | 0.02    | 0.04   | 0.03    | 0.01    | 0.00   | 0.00   | 0.00   | 0.00   |
| ApoCA      | 0.04    | 0.06   | 0.03    | 0.02    | 0.00   | 0.00   | 0.00   | 0.00   |
| HDCA       | 0.98    | 1.12   | 0.59    | 0.23    | 0.04   | 0.03   | 0.01   | 0.04   |
| MuroCA     | 0.30    | 0.41   | 0.16    | 0.16    | 0.00   | 0.00   | 0.00   | 0.00   |
| UDCA       | 3.77    | 4.75   | 1.69    | 1.98    | 0.00   | 0.00   | 0.00   | 0.00   |
| DioLCA     | 0.09    | 0.10   | 0.11    | 0.04    | 0.00   | 0.00   | 0.00   | 0.00   |
| ILCA       | 0.13    | 0.46   | 0.17    | 0.23    | 0.00   | 0.00   | 0.00   | 0.00   |
| IDCA       | 0.01    | 0.00   | 0.00    | 0.00    | 0.00   | 0.00   | 0.00   | 0.00   |
| 12-KCDCA   | 0.76    | 1.11   | 0.44    | 0.36    | 0.00   | 0.00   | 0.00   | 0.00   |
| 23-NDCA    | 0.00    | 0.00   | 0.00    | 0.00    | 0.00   | 0.00   | 0.00   | 0.00   |
| 3-OCA      | 0.18    | 0.22   | 0.22    | 0.15    | 0.00   | 0.00   | 0.00   | 0.00   |
| 6,7-DiKLCA | 0.01    | 0.01   | 0.01    | 0.01    | 0.00   | 0.00   | 0.00   | 0.00   |
| aMCA       | 79.17   | 148.01 | 34.90   | 58.28   | 0.15   | 0.18   | 0.22   | 0.08   |
| bMCA       | 40.53   | 41.76  | 24.68   | 20.20   | 0.03   | 0.02   | 0.04   | 0.04   |
| HCA        | 0.93    | 2.28   | 0.27    | 0.47    | 0.00   | 0.00   | 0.00   | 0.00   |
| wMCA       | 366.69  | 553.28 | 157.08  | 79.69   | 0.02   | 0.01   | 0.01   | 0.02   |
| GCA        | 0.02    | 0.04   | 0.03    | 0.03    | 0.01   | 0.00   | 0.01   | 0.01   |
| CDCA       | 0.01    | 0.01   | 0.02    | 0.02    | 0.00   | 0.00   | 0.00   | 0.00   |
| GUDCA      | 0.00    | 0.00   | 0.00    | 0.00    | 0.00   | 0.00   | 0.00   | 0.00   |
| GLCA       | 0.00    | 0.00   | 0.00    | 0.00    | 0.00   | 0.00   | 0.00   | 0.00   |
| GHCA       | 0.00    | 0.00   | 0.00    | 0.00    | 0.00   | 0.00   | 0.00   | 0.00   |
| TDCA       | 10.73   | 7.23   | 4.25    | 6.39    | 0.00   | 0.00   | 0.00   | 0.00   |
| TCDCa      | 0.25    | 1.29   | 0.16    | 0.74    | 0.63   | 1.28   | 0.96   | 0.82   |
| TCA        | 14.56   | 38.41  | 15.69   | 24.62   | 19.48  | 26.25  | 28.84  | 12.81  |
| TDHCA      | 0.00    | 0.01   | 0.01    | 0.01    | 0.01   | 0.00   | 0.00   | 0.01   |
| TLCA       | 0.37    | 0.65   | 0.30    | 0.07    | 0.00   | 0.00   | 0.00   | 0.00   |
| THDC+TUDC  | 3.96    | 26.17  | 0.70    | 6.31    | 2.84   | 5.38   | 4.28   | 4.36   |
| THC        | 0.79    | 4.06   | 0.83    | 0.63    | 0.14   | 0.06   | 0.06   | 0.06   |
| TaMCA      | 45.64   | 189.04 | 37.28   | 36.78   | 24.79  | 31.45  | 19.24  | 27.17  |
| TbMCA      | 94.64   | 638.11 | 91.39   | 115.17  | 379.14 | 247.45 | 179.87 | 271.46 |
| TwMCA      | 49.10   | 154.90 | 13.51   | 12.74   | 0.15   | 0.05   | 0.05   | 0.08   |
| UCA        | 0.06    | 0.10   | 0.13    | 0.07    | 0.02   | 0.00   | 0.01   | 0.01   |
| GwMCA      | 0.05    | 0.05   | 0.06    | 0.05    | 0.00   | 0.00   | 0.00   | 0.00   |
| GaMCA      | 0.02    | 0.02   | 0.01    | 0.01    | 0.00   | 0.00   | 0.00   | 0.00   |
| GbMCA      | 0.05    | 0.06   | 0.04    | 0.01    | 0.05   | 0.03   | 0.03   | 0.05   |
| GalloCA    | 0.01    | 0.02   | 0.03    | 0.02    | 0.00   | 0.00   | 0.00   | 0.00   |



Supplemental Table 3

| 2w AOV     | p.value<br>Microbial status | p.value<br>Diet | p.value<br>Interaction |
|------------|-----------------------------|-----------------|------------------------|
| CA         | 7.08E-007 *                 | 1.09E-001       | 1.26E-001              |
| DCA        | 7.20E-013 *                 | 2.83E-002 #     | 2.81E-002 *            |
| LCA        | 2.07E-010 *                 | 3.10E-001       | 3.36E-001              |
| ACA        | 6.27E-021 *                 | 6.33E-001       | 6.64E-001              |
| CDCA       | 9.38E-006 *                 | 4.24E-001       | 4.10E-001              |
| DHCA       | 1.69E-005 *                 | 2.74E-002 #     | 1.47E-001              |
| 12-KLCA    | 2.01E-010 *                 | 3.53E-001       | 4.15E-001              |
| DHLCA      | 4.71E-009 *                 | 3.84E-001       | 4.07E-001              |
| 7-KDCA     | 3.72E-008 *                 | 2.80E-001       | 3.58E-001              |
| 7-KLCA     | 1.24E-009 *                 | 4.71E-001       | 4.77E-001              |
| AILCA      | 9.37E-012 *                 | 5.52E-001       | 5.49E-001              |
| ApoCA      | 1.39E-012 *                 | 5.45E-001       | 5.83E-001              |
| HDCA       | 8.04E-008 *                 | 1.57E-001       | 2.06E-001              |
| MuroCA     | 3.96E-010 *                 | 4.04E-001       | 4.12E-001              |
| UDCA       | 2.03E-010 *                 | 4.43E-001       | 4.69E-001              |
| DioLCA     | 2.04E-013 *                 | 2.64E-002 #     | 2.64E-002 *            |
| ILCA       | 9.03E-009 *                 | 6.19E-001       | 6.29E-001              |
| IDCA       | 2.43E-001                   | 3.07E-001       | 2.69E-001              |
| 12-KCDCA   | 1.01E-010 *                 | 3.02E-001       | 3.29E-001              |
| 23-NDCA    | 2.47E-005 *                 | 4.58E-003 #     | 1.78E-001              |
| 3-OCA      | 1.97E-007 *                 | 2.97E-001       | 2.91E-001              |
| 6,7-DiKLCA | 4.36E-008 *                 | 1.15E-001       | 5.07E-001              |
| aMCA       | 1.98E-010 *                 | 2.09E-002 #     | 3.00E-002 *            |
| bMCA       | 4.99E-010 *                 | 5.81E-001       | 6.05E-001              |
| HCA        | 2.29E-010 *                 | 1.13E-001       | 1.15E-001              |
| wMCA       | 2.94E-009 *                 | 2.25E-002 #     | 2.25E-002 *            |
| GCA        | 1.39E-004 *                 | 2.42E-002 #     | 8.30E-001              |
| CDCA       | 7.85E-014 *                 | 2.51E-001       | 2.65E-001              |
| GUDCA      | 3.71E-002 *                 | 1.37E-001       | 1.40E-002 *            |
| GLCA       | 1.41E-016 *                 | 8.17E-001       | 8.31E-001              |
| GHCA       | 2.33E-004 *                 | 9.08E-001       | 5.37E-001              |
| TDCA       | 1.45E-010 *                 | 4.59E-001       | 4.80E-001              |
| TCDCA      | 1.28E-004 *                 | 1.19E-006 #     | 2.65E-001              |
| TCA        | 2.80E-004 *                 | 4.59E-008 #     | 3.24E-002 *            |
| TDHCA      | 9.40E-009 *                 | 1.62E-002 #     | 2.07E-006 *            |
| TLCA       | 2.89E-009 *                 | 4.75E-002 #     | 5.00E-002              |
| THDC+TUDC  | 6.22E-001                   | 1.09E-003 #     | 4.06E-002 *            |
| THC        | 7.75E-008 *                 | 3.49E-005 #     | 4.89E-005 *            |
| TaMCA      | 1.18E-002 *                 | 9.77E-005 #     | 5.62E-002              |
| TbMCA      | 7.10E-004 *                 | 1.41E-003 #     | 2.84E-001              |
| TwMCA      | 7.33E-007 *                 | 2.03E-004 #     | 2.03E-004 *            |
| UCA        | 3.32E-007 *                 | 8.32E-001       | 4.75E-002 *            |
| GwMCA      | 3.18E-011 *                 | 9.74E-001       | 9.76E-001              |
| GaMCA      | 6.91E-007 *                 | 6.48E-002       | 8.23E-001              |
| GbMCA      | 6.65E-002                   | 3.90E-002 #     | 8.64E-001              |
| GalloCA    | 1.50E-004 *                 | 3.68E-002 #     | 2.14E-001              |

Supplemental Table 3

| 1w AOV<br>CVZ | p.value<br>1w AOV | p.value<br>WD-LFD | p.value<br>WD-RS2 | p.value<br>WD-RS4 |
|---------------|-------------------|-------------------|-------------------|-------------------|
| CA            | 1.30E-001         | 2.92E-001         | 9.36E-001         | 9.03E-002         |
| DCA           | 3.43E-002 *       | 9.19E-001 *       | 4.88E-001         | 1.63E-002 *       |
| LCA           | 3.25E-001         | 3.95E-001         | 8.28E-001         | 2.04E-001         |
| ACA           | 6.44E-001         | 9.96E-001         | 9.22E-001         | 7.77E-001         |
| CDCA          | 4.33E-001         | 7.30E-001         | 4.76E-001         | 9.95E-001         |
| DHCA          | 1.03E-001         | 1.90E-001         | 8.85E-001         | 5.39E-001         |
| 12-KLCA       | 3.67E-001         | 9.00E-001         | 9.16E-001         | 5.10E-001         |
| DHLCA         | 4.03E-001         | 5.94E-001         | 9.80E-001         | 2.97E-001         |
| 7-KDCA        | 3.19E-001         | 8.91E-001         | 9.92E-001         | 5.05E-001         |
| 7-KLCA        | 4.72E-001         | 7.94E-001         | 3.21E-001         | 4.86E-001         |
| AILCA         | 5.62E-001         | 9.98E-001         | 6.78E-001         | 9.43E-001         |
| ApoCA         | 5.60E-001         | 9.69E-001         | 9.70E-001         | 7.01E-001         |
| HDCA          | 1.79E-001         | 1.00E+000         | 8.65E-001         | 1.30E-001         |
| MuroCA        | 4.08E-001         | 1.00E+000         | 4.19E-001         | 6.33E-001         |
| UDCA          | 4.46E-001         | 8.91E-001         | 4.32E-001         | 3.45E-001         |
| DioLCA        | 3.73E-002 *       | 9.62E-001 *       | 1.78E-001         | 4.44E-001         |
| ILCA          | 6.20E-001         | 5.87E-001         | 6.76E-001         | 4.86E-001         |
| IDCA          | 2.98E-001         | 2.48E-001         | 9.98E-001         | 1.00E+000         |
| 12-KCDCA      | 3.17E-001         | 6.13E-001         | 4.24E-001         | 1.73E-001         |
| 23-NDCA       | 6.36E-002         | 9.49E-001         | 1.71E-001         | 2.42E-001         |
| 3-OCA         | 3.13E-001         | 5.16E-001         | 9.90E-001         | 2.44E-001         |
| 6,7-DiKLCA    | 7.74E-001         | 9.55E-001         | 7.91E-001         | 9.93E-001         |
| aMCA          | 2.86E-002 *       | 3.00E-001 *       | 6.27E-002         | 1.29E-002 *       |
| bMCA          | 5.89E-001         | 9.64E-001         | 7.64E-001         | 4.18E-001         |
| HCA           | 1.33E-001         | 2.98E-001         | 6.84E-001         | 6.19E-002         |
| wMCA          | 3.01E-002 *       | 7.28E-001 *       | 9.29E-002         | 1.87E-002 *       |
| GCA           | 2.42E-001         | 2.21E-001         | 6.16E-001         | 1.81E-001         |
| CDCA          | 2.69E-001         | 3.47E-001         | 4.09E-001         | 1.56E-001         |
| GUDCA         | 1.41E-001         | 9.85E-001         | 9.52E-002         | 9.66E-001         |
| GLCA          | 8.20E-001         | 9.69E-001         | 8.97E-001         | 9.77E-001         |
| GHCA          | 7.37E-001         | 9.42E-001         | 8.45E-001         | 9.98E-001         |
| TDCA          | 4.75E-001         | 9.75E-001         | 8.44E-001         | 3.18E-001         |
| TCDCA         | 1.50E-003 *       | 1.77E-003 *       | 1.93E-003 *       | 6.70E-003 *       |
| TCA           | 1.23E-002 *       | 1.68E-002 *       | 1.97E-002 *       | 1.70E-002 *       |
| TDHCA         | 1.42E-001         | 5.93E-002         | 5.18E-001         | 3.39E-001         |
| TLCA          | 5.92E-002         | 6.00E-001         | 8.84E-001         | 2.67E-002         |
| THDC+TUDC     | 1.44E-002 *       | 2.58E-002 *       | 1.48E-002 *       | 2.60E-002 *       |
| THC           | 1.68E-004 *       | 5.17E-004 *       | 1.25E-003 *       | 2.02E-004 *       |
| TaMCA         | 4.48E-003 *       | 8.07E-003 *       | 1.31E-002 *       | 4.89E-003 *       |
| TbMCA         | 9.80E-003 *       | 2.53E-002 *       | 1.24E-002 *       | 1.14E-002 *       |
| TwMCA         | 6.57E-004 *       | 2.65E-002 *       | 8.26E-004 *       | 7.23E-004 *       |
| UCA           | 5.66E-001         | 5.48E-001         | 9.99E-001         | 8.02E-001         |
| GwMCA         | 9.74E-001         | 9.99E-001         | 9.88E-001         | 9.83E-001         |
| GaMCA         | 3.99E-001         | 5.56E-001         | 9.05E-001         | 2.54E-001         |
| GbMCA         | 5.76E-001         | 4.88E-001         | 1.00E+000         | 8.00E-001         |
| GalloCA       | 1.76E-001         | 1.67E-001         | 1.00E+000         | 1.00E+000         |

Supplemental Table 3

| 1w AOV<br>GF | p.value<br>1w AOV | p.value<br>WD-LFD | p.value<br>WD-RS2 | p.value<br>WD-RS4 |
|--------------|-------------------|-------------------|-------------------|-------------------|
| CA           | 6.11E-001         | 8.78E-001         | 9.04E-001         | 8.77E-001         |
| DCA          | 1.99E-001         | 9.97E-001         | 9.00E-001         | 1.32E-001         |
| LCA          | 6.15E-002         | 1.10E-001         | 9.56E-001         | 9.64E-001         |
| ACA          | 8.49E-002         | 2.99E-001         | 9.82E-001         | 5.06E-001         |
| CDCA         | 6.95E-001         | 5.64E-001         | 9.77E-001         | 7.63E-001         |
| DHCA         | 1.06E-005 *       | 7.82E-003 *       | 2.70E-001         | 1.15E-002 *       |
| 12-KLCA      | 1.41E-002 *       | 2.60E-002 *       | 1.54E-002 *       | 2.66E-002 *       |
| DHLCA        | NaN               | NaN               | NaN               | NaN               |
| 7-KDCA       | 2.90E-004 *       | 8.64E-004 *       | 8.77E-001         | 3.51E-001         |
| 7-KLCA       | NaN               | NaN               | NaN               | NaN               |
| AILCA        | NaN               | NaN               | NaN               | NaN               |
| ApoCA        | NaN               | NaN               | NaN               | NaN               |
| HDCA         | 8.27E-001         | 9.03E-001         | 9.99E-001         | 9.67E-001         |
| MuroCA       | NaN               | NaN               | NaN               | NaN               |
| UDCA         | 1.89E-003 *       | 9.99E-001         | 4.58E-003 *       | 8.96E-001         |
| DioLCA       | NaN               | NaN               | NaN               | NaN               |
| ILCA         | NaN               | NaN               | NaN               | NaN               |
| IDCA         | NaN               | NaN               | NaN               | NaN               |
| 12-KCDCA     | 5.72E-004 *       | 1.50E-002 *       | 7.06E-001         | 1.93E-002 *       |
| 23-NDCA      | 2.18E-002 *       | 3.94E-002 *       | 3.49E-002 *       | 1.91E-002 *       |
| 3-OCA        | NaN               | NaN               | NaN               | NaN               |
| 6,7-DiKLCA   | 1.25E-010 *       | 3.52E-005 *       | 3.78E-006 *       | 3.91E-002 *       |
| aMCA         | 2.35E-002 *       | 2.63E-001         | 6.23E-001         | 8.14E-003 *       |
| bMCA         | 1.31E-010 *       | 4.67E-003 *       | 1.54E-008 *       | 1.00E+000         |
| HCA          | 1.10E-003 *       | 1.51E-003 *       | 9.99E-001         | 4.50E-001         |
| wMCA         | 8.58E-002         | 4.02E-002         | 8.58E-001         | 4.74E-001         |
| GCA          | 8.42E-006 *       | 3.34E-005 *       | 4.11E-003 *       | 6.47E-006 *       |
| CDCA         | NaN               | NaN               | NaN               | NaN               |
| GUDCA        | 7.21E-004 *       | 5.95E-004 *       | 9.73E-001         | 1.61E-001         |
| GLCA         | NaN               | NaN               | NaN               | NaN               |
| GHCA         | 4.29E-001         | 1.00E+000         | 3.86E-001         | 1.00E+000         |
| TDCA         | 1.89E-001         | 1.34E-001         | 9.61E-001         | 3.74E-001         |
| TCDCA        | 6.14E-004 *       | 3.51E-004 *       | 9.08E-002         | 2.01E-003 *       |
| TCA          | 1.85E-006 *       | 2.61E-006 *       | 2.03E-002 *       | 4.07E-006 *       |
| TDHCA        | 1.89E-006 *       | 4.12E-006 *       | 1.00E+000         | 1.00E+000         |
| TLCA         | 3.12E-007 *       | 1.68E-004 *       | 2.00E-001         | 6.12E-004 *       |
| THDC+TUDC    | 9.47E-004 *       | 2.47E-003 *       | 9.98E-001         | 1.89E-002 *       |
| THC          | 4.72E-001         | 8.16E-001         | 8.50E-001         | 8.23E-001         |
| TaMCA        | 7.77E-004 *       | 4.09E-004 *       | 1.69E-002 *       | 2.48E-003 *       |
| TbMCA        | 1.21E-001         | 7.06E-002         | 7.43E-001         | 2.12E-001         |
| TwMCA        | 9.07E-001         | 8.38E-001         | 9.98E-001         | 9.99E-001         |
| UCA          | 2.89E-011 *       | 7.11E-015 *       | 3.21E-001         | 1.60E-001         |
| GwMCA        | NaN               | NaN               | NaN               | NaN               |
| GaMCA        | 5.50E-004 *       | 2.26E-004 *       | 2.12E-002 *       | 2.70E-003 *       |
| GbMCA        | 4.29E-002 *       | 1.91E-002 *       | 7.58E-001         | 2.54E-001         |
| GalloCA      | 1.00E-005 *       | 4.64E-005 *       | 4.30E-003 *       | 1.34E-005 *       |

**Supplemental Table 3**

| <b>Pearson r</b>                                  | CD11c (SAT)   | F4/80 (SAT)  | insulin (pM)  | HOMA-IR       | p<0.05 |
|---------------------------------------------------|---------------|--------------|---------------|---------------|--------|
| Isolithocholic acid                               | -0.0352546945 | 0.014742746  | -0.1796823442 | -0.2054184228 | q<0.05 |
| Taurochenodeoxycholic acid                        | 0.3550248742  | 0.3751581609 | 0.5346249342  | 0.5547686815  |        |
| Murocholic acid                                   | -0.0070430548 | 0.0471135415 | -0.1382373273 | -0.1715968102 |        |
| Tauroolithocholic acid                            | 0.0812138692  | 0.1023225933 | -0.0739841834 | -0.1026603356 |        |
| Chenodeoxycholic acid                             | 0.267929107   | 0.2461850792 | -0.1450288892 | -0.1513807476 |        |
| 12-Ketochenodeoxycholic acid                      | 0.0756820887  | 0.1205104291 | -0.1208036616 | -0.1517657042 |        |
| Hyodeoxycholic acid                               | -0.0115417056 | 0.0305692274 | -0.1746860147 | -0.1865325272 |        |
| Taurohyocholic acid                               | 0.2159255594  | 0.2120873183 | -0.0175491292 | -0.0451331511 |        |
| Hyochoolic acid                                   | 0.0611284152  | 0.1148756668 | -0.152200222  | -0.1752488315 |        |
| Lithocholic acid                                  | 0.045684617   | 0.0849980712 | -0.1502563655 | -0.1771179885 |        |
| 12-Ketolithocholic acid                           | -0.0567168072 | 0.0141955679 | -0.2116084397 | -0.2368295044 |        |
| 7-Ketodeoxycholic acid                            | -0.0424398035 | 0.0041016294 | -0.2114225477 | -0.2244059294 |        |
| Ursodeoxycholic acid                              | 0.0774641186  | 0.1000497714 | -0.1422722936 | -0.1744169891 |        |
| Taurohyodeoxycholic and Tauroursodeoxycholic acid | 0.2806141973  | 0.2735173702 | 0.1688374728  | 0.1670140177  |        |
| Taurodeoxycholic acid                             | 0.1267015487  | 0.1752401888 | -0.1436080188 | -0.1601172984 |        |
| Allocholic acid                                   | 0.1536984593  | 0.1961731017 | -0.169279024  | -0.1943936795 |        |
| Taurocholic acid                                  | 0.3594596684  | 0.3717797697 | 0.5365024805  | 0.5525179505  |        |
| β-muricholic acid                                 | 0.1071741655  | 0.1248981357 | -0.0841944143 | -0.1172606573 |        |
| Tauro-α-muricholic acid                           | 0.2905148864  | 0.2581671774 | 0.2152154595  | 0.1972515881  |        |
| Cholic acid                                       | 0.1749079973  | 0.1561232358 | -0.0268603656 | -0.067033872  |        |
| Tauro-ω-muricholic acid                           | 0.1751672477  | 0.1600849777 | -0.0446925797 | -0.0624160729 |        |
| α-muricholic acid                                 | 0.1850809455  | 0.1993665099 | -0.0457266793 | -0.0834447891 |        |
| Tauro-β-muricholic acid                           | 0.1243511736  | 0.1125323996 | 0.3187763393  | 0.3227938116  |        |
| Deoxycholic acid                                  | 0.0873883069  | 0.1330688298 | -0.1334968358 | -0.1637497097 |        |
| Ω-muricholic acid                                 | 0.0764191896  | 0.1214735582 | -0.1147332191 | -0.1408189237 |        |

**Supplemental Table 3**

| <b>P-values</b>                                   | CD11c (SAT)  | F4/80 (SAT)  | insulin (pM)  | HOMA-IR       |
|---------------------------------------------------|--------------|--------------|---------------|---------------|
| Isolithocholic acid                               | 0.7855982262 | 0.9094532571 | 0.1622843503  | 0.1092260272  |
| Taurochenodeoxycholic acid                        | 0.0057950797 | 0.0034143497 | 0.000012903   | 5.127413E-006 |
| Murocholic acid                                   | 0.9566729555 | 0.716138227  | 0.28395161    | 0.1823437951  |
| Tauroolithocholic acid                            | 0.5338054914 | 0.4326325308 | 0.5709463601  | 0.4311070553  |
| Chenodeoxycholic acid                             | 0.0384786107 | 0.0579437809 | 0.2688931797  | 0.2482574836  |
| 12-Ketochenodeoxycholic acid                      | 0.55879435   | 0.3508224348 | 0.3496428811  | 0.2389878738  |
| Hyodeoxycholic acid                               | 0.9296528397 | 0.8150869684 | 0.1781428253  | 0.1500390004  |
| Taurohyocholic acid                               | 0.0975237255 | 0.1037734194 | 0.894125653   | 0.7320346394  |
| Hyochoolic acid                                   | 0.6426674837 | 0.3821165471 | 0.2456760358  | 0.1804707164  |
| Lithocholic acid                                  | 0.7288854363 | 0.5184656326 | 0.251829408   | 0.1757935055  |
| 12-Ketolithocholic acid                           | 0.6668817178 | 0.9142727863 | 0.1045744265  | 0.0684704892  |
| 7-Ketodeoxycholic acid                            | 0.7474776271 | 0.9751875061 | 0.1048866479  | 0.0847557255  |
| Ursodeoxycholic acid                              | 0.5529199001 | 0.4429769971 | 0.2740560893  | 0.1788225575  |
| Taurohyodeoxycholic and Tauroursodeoxycholic acid | 0.0298749259 | 0.0344645453 | 0.1971968883  | 0.202149612   |
| Taurodeoxycholic acid                             | 0.3305397356 | 0.1767485322 | 0.2695299228  | 0.2177041333  |
| Allocholic acid                                   | 0.2329884502 | 0.1264818402 | 0.1884112214  | 0.1300282676  |
| Taurocholic acid                                  | 0.0047913376 | 0.0034463402 | 9.936188E-006 | 4.713898E-006 |
| $\beta$ -muricholic acid                          | 0.4070432652 | 0.3334295709 | 0.5152966243  | 0.3640590994  |
| Tauro- $\alpha$ -muricholic acid                  | 0.0231299402 | 0.0445550548 | 0.0929827109  | 0.1243684118  |
| Cholic acid                                       | 0.1851750022 | 0.23357231   | 0.8385727323  | 0.6108276673  |
| Tauro- $\omega$ -muricholic acid                  | 0.1769315969 | 0.217798237  | 0.7301541881  | 0.6298533984  |
| $\alpha$ -muricholic acid                         | 0.1532936182 | 0.1234632876 | 0.7263900883  | 0.5225898111  |
| Tauro- $\beta$ -muricholic acid                   | 0.3396615369 | 0.387878673  | 0.0115625518  | 0.0105018255  |
| Deoxycholic acid                                  | 0.5067290818 | 0.3107830593 | 0.3092153268  | 0.2112351178  |
| $\Omega$ -muricholic acid                         | 0.5583040831 | 0.3510414675 | 0.3786051215  | 0.2790380631  |

**Supplemental Table 3**

| <b>Q-values</b>                                   | CD11c (SAT)  | F4/80 (SAT)  | insulin (pM) | HOMA-IR      |
|---------------------------------------------------|--------------|--------------|--------------|--------------|
| Isolithocholic acid                               | 0.8539111154 | 0.9425492642 | 0.4710280534 | 0.4551084466 |
| Taurochenodeoxycholic acid                        | 0.072438496  | 0.0574390035 | 0.0003225753 | 0.0002563707 |
| Murocholic acid                                   | 0.9663363187 | 0.8133718215 | 0.5070564464 | 0.4710280534 |
| Taurolithocholic acid                             | 0.6932538849 | 0.6093415927 | 0.7048720495 | 0.6093415927 |
| Chenodeoxycholic acid                             | 0.2748472191 | 0.3621486305 | 0.5070564464 | 0.493783153  |
| 12-Ketochenodeoxycholic acid                      | 0.6984929375 | 0.548502293  | 0.548502293  | 0.493783153  |
| Hyodeoxycholic acid                               | 0.9486253467 | 0.8764376004 | 0.4710280534 | 0.4710280534 |
| Taurohyocholic acid                               | 0.4551084466 | 0.4551084466 | 0.9411848979 | 0.8133718215 |
| Hyochoolic acid                                   | 0.7650803377 | 0.5703232047 | 0.493783153  | 0.4710280534 |
| Lithocholic acid                                  | 0.8133718215 | 0.6876181725 | 0.493783153  | 0.4710280534 |
| 12-Ketolithocholic acid                           | 0.7845667269 | 0.9425492642 | 0.4551084466 | 0.4027675836 |
| 7-Ketodeoxycholic acid                            | 0.8214039858 | 0.9751875061 | 0.4551084466 | 0.4551084466 |
| Ursodeoxycholic acid                              | 0.6984929375 | 0.6152458293 | 0.5070564464 | 0.4710280534 |
| Taurohyodeoxycholic and Tauroursodeoxycholic acid | 0.2489577159 | 0.265111887  | 0.4809680203 | 0.4813086    |
| Taurodeoxycholic acid                             | 0.548502293  | 0.4710280534 | 0.5070564464 | 0.4839960822 |
| Allocholic acid                                   | 0.493783153  | 0.4643866699 | 0.4710280534 | 0.4643866699 |
| Taurocholic acid                                  | 0.0684476798 | 0.0574390035 | 0.0003225753 | 0.0002563707 |
| $\beta$ -muricholic acid                          | 0.5899177757 | 0.548502293  | 0.6876181725 | 0.5600909221 |
| Tauro- $\alpha$ -muricholic acid                  | 0.2102721837 | 0.2970336984 | 0.4551084466 | 0.4643866699 |
| Cholic acid                                       | 0.4710280534 | 0.493783153  | 0.8920986514 | 0.7449117895 |
| Tauro- $\omega$ -muricholic acid                  | 0.4710280534 | 0.4839960822 | 0.8133718215 | 0.7588595162 |
| $\alpha$ -muricholic acid                         | 0.4710280534 | 0.4643866699 | 0.8133718215 | 0.6876181725 |
| Tauro- $\beta$ -muricholic acid                   | 0.548502293  | 0.5704098133 | 0.1156255177 | 0.1156255177 |
| Deoxycholic acid                                  | 0.6876181725 | 0.5358328608 | 0.5358328608 | 0.4839960822 |
| $\Omega$ -muricholic acid                         | 0.6984929375 | 0.548502293  | 0.5703232047 | 0.5070564464 |

Supplemental Table 4

|                            | LFD<br>D12450K |             | WD<br>modified D12451 |             | RS2         |             | RS4         |             |
|----------------------------|----------------|-------------|-----------------------|-------------|-------------|-------------|-------------|-------------|
|                            | gm%            | kcal%       | gm%                   | kcal%       | gm%         | kcal%       | gm%         | kcal%       |
| <b>Protein</b>             | <b>19.2</b>    | <b>20.0</b> | <b>23.7</b>           | <b>20.0</b> | <b>23.7</b> | <b>21.9</b> | <b>23.7</b> | <b>21.9</b> |
| <b>Carbohydrate</b>        | <b>67.3</b>    | <b>70.0</b> | <b>46.1</b>           | <b>34.1</b> | <b>46.1</b> | <b>28.0</b> | <b>46.1</b> | <b>28.0</b> |
| <b>Fat</b>                 | <b>4.3</b>     | <b>10.0</b> | <b>23.6</b>           | <b>44.9</b> | <b>23.6</b> | <b>49.1</b> | <b>23.6</b> | <b>49.1</b> |
| Total                      |                | 100.0       | 93.4                  | 99.0        | 93.4        | 98.9        | 93.4        | 98.9        |
| kcal/gm                    | 3.8            |             | 4.7                   |             | 4.3         |             | 4.3         |             |
| <b>Ingredients</b>         | <b>gm</b>      | <b>kcal</b> |                       |             |             |             |             |             |
| Casein, 30 Mesh            | 200.0          | 800.0       | 200.0                 | 800.0       | 200.0       | 800.0       | 200.0       | 800.0       |
| L-cystine                  | 3.0            | 12.0        | 3.0                   | 12.0        | 3.0         | 12.0        | 3.0         | 12.0        |
| Corn Starch                | 550.0          | 2200.0      | 137.3                 | 549.2       | 0.0         | 0.0         | 41.0        | 164.0       |
| Maltodextrine 10           | 150.0          | 600.0       | 35.5                  | 142.0       | 35.5        | 142.0       | 35.5        | 142.0       |
| Sucrose                    | 0.0            | 0.0         | 172.8                 | 691.0       | 172.8       | 691.0       | 172.8       | 691.0       |
| HiMaize (RS2)              | 0.0            | 0.0         | 0.0                   | 0.0         | 137.3       | 206.0       | 0.0         | 0.0         |
| Fybersym (RS4)             | 0.0            | 0.0         | 0.0                   | 0.0         | 0.0         | 0.0         | 96.3        | 42.0        |
| Cellulose microcrystalline | 0.0            | 0.0         | 0.0                   | 0.0         | 0.0         | 0.0         | 0.0         | 0.0         |
| Cellulose BW200            | 50.0           | 0.0         | 50.0                  | 0.0         | 50.0        | 0.0         | 50.0        | 0.0         |
| Soybean Oil                | 25.0           | 225.0       | 25.0                  | 225.0       | 25.0        | 225.0       | 25.0        | 225.0       |
| Lard                       | 20.0           | 180.0       | 177.5                 | 1598.0      | 177.5       | 1598.0      | 177.5       | 1598.0      |
| Mineral Mix S10026         | 10.0           | 0.0         | 10.0                  | 0.0         | 10.0        | 0.0         | 10.0        | 0.0         |
| DiCalcium Phosphate        | 13.0           | 0.0         | 13.0                  | 0.0         | 13.0        | 0.0         | 13.0        | 0.0         |
| Calcium Carbonate          | 5.5            | 0.0         | 5.5                   | 0.0         | 5.5         | 0.0         | 5.5         | 0.0         |
| Potassium Citrate, 1H2O    | 16.5           | 0.0         | 16.5                  | 0.0         | 16.5        | 0.0         | 16.5        | 0.0         |
| Vitamin Mix V1001          | 10.0           | 40.0        | 10.0                  | 40.0        | 10.0        | 40.0        | 10.0        | 40.0        |
| Choline Bitartrate         | 2.0            | 0.0         | 2.0                   | 0.0         | 2.0         | 0.0         | 2.0         | 0.0         |
| Dyes                       | 0.1            | 0.0         | 0.1                   | 0.0         | 0.1         | 0.0         | 0.1         | 0.0         |
| Total                      | 1055.1         | 4057.0      | 858.2                 | 4057.2      | 858.2       | 3714.0      | 858.2       | 3714.0      |
